# Supplementary material for: Current Treatment Options in Homozygous Familial Hypercholesterolemia
Source: MDPI journal article supplement (doi:10.3390/ph16010064), 2022-12-31
Supplement: s1 [file s1]

**Supp Table S1.** Summary of pending and conducted clinical studies of lipid lowering agents in HoFH (Data is retrived from clinicaltrials.gov – Access date: Dec 2022)

| NCT Number<br>(Study<br>Acronym) | Drug                   | Status                    | Phases<br>Study type                                        | Age              | Conditions<br>(enrollment ;n) | Outcome Measures                            | URL                                                                                                                   |
|----------------------------------|------------------------|---------------------------|-------------------------------------------------------------|------------------|-------------------------------|---------------------------------------------|-----------------------------------------------------------------------------------------------------------------------|
| NCT05611528                      | Evinacumab             | Not yet<br>recruiting     | Phase 4<br>Interventional<br>Single Group<br>Open Label     | >18 Years        | HoFH (10)                     | Efficacy, Safety, Tolerability              | <a href="https://ClinicalTrials.gov/s&lt;br/&gt;how/NCT05611528">https://ClinicalTrials.gov/s<br/>how/NCT05611528</a> |
| NCT04233918                      | Evinacumab             | Active, not<br>recruiting | Phase 3<br>Interventional<br>Single group<br>Open label     | 5 -11 Years      | HoFH (20)                     | Efficacy, Safety, Tolerability              | <a href="https://ClinicalTrials.gov/s&lt;br/&gt;how/NCT04233918">https://ClinicalTrials.gov/s<br/>how/NCT04233918</a> |
| NCT03409744                      | Evinacumab             | Active, not<br>recruiting | Phase 3<br>Interventional<br>Single group<br>Open label     | > 12 Years       | HoFH (116)                    | Long term Efficacy, Safety,<br>Tolerability | <a href="https://ClinicalTrials.gov/s&lt;br/&gt;how/NCT03409744">https://ClinicalTrials.gov/s<br/>how/NCT03409744</a> |
| NCT03399786                      | Evinacumab             | Completed                 | Phase 3<br>Interventional<br>Randomized<br>MaskingQuadruple | > 12 Years       | HoFH (65)                     | Efficacy, Safety, Tolerability              | <a href="https://ClinicalTrials.gov/s&lt;br/&gt;how/NCT03399786">https://ClinicalTrials.gov/s<br/>how/NCT03399786</a> |
| NCT02265952                      | Evinacumab             | Completed                 | Phase 2<br>Interventional<br>Single group<br>Open label     | > 18 Years       | HoFH (9)                      | Efficacy, Safety, Tolerability              | <a href="https://ClinicalTrials.gov/s&lt;br/&gt;how/NCT02265952">https://ClinicalTrials.gov/s<br/>how/NCT02265952</a> |
| NCT05217667<br>(GATEWAY)         | ARO-ANG 3<br>Injection | Recruiting                | Phase 2<br>Interventional<br>Randomized<br>Open label       | > 16 Years       | HoFH (16)                     | Efficacy, Safety, Tolerability              | <a href="https://ClinicalTrials.gov/s&lt;br/&gt;how/NCT05217667">https://ClinicalTrials.gov/s<br/>how/NCT05217667</a> |
| NCT03851705<br>(ORION-5)         | Inclisiran             | Completed                 | Phase 3<br>Interventional<br>Randomized<br>MaskingDouble    | 18 - 80<br>Years | HoFH (56)                     | Efficacy, Safety, Tolerability              | <a href="https://ClinicalTrials.gov/s&lt;br/&gt;how/NCT03851705">https://ClinicalTrials.gov/s<br/>how/NCT03851705</a> |

|                                  |                                                                    |                           |                                                              |                  |                                     |                                                   |                                                                                                         |
|----------------------------------|--------------------------------------------------------------------|---------------------------|--------------------------------------------------------------|------------------|-------------------------------------|---------------------------------------------------|---------------------------------------------------------------------------------------------------------|
| NCT04659863<br>(ORION-13)        | Inclisiran                                                         | Recruiting                | Phase 3<br>Interventional<br>Randomized<br>Masking Double    | 12 - 17 Years    | HoFH (12)                           | Efficacy, Safety, Tolerability                    | <a href="https://ClinicalTrials.gov/s/how/NCT04659863">https://ClinicalTrials.gov/s/how/NCT04659863</a> |
| NCT03814187<br>(ORION-8)         | Inclisiran                                                         | Active, not<br>recruiting | Phase 3<br>Interventional<br>Single group<br>Open label      | > 18 Years       | ASCVD,<br>HeFH,  HoFH All<br>(3275) | Efficacy, Safety, Tolerability                    | <a href="https://ClinicalTrials.gov/s/how/NCT03814187">https://ClinicalTrials.gov/s/how/NCT03814187</a> |
| NCT02963311<br>(ORION-2)         | Inclisiran                                                         | Completed                 | Phase 2<br>Interventional<br>Single group<br>Open label      | > 12 Years       | HoFH (9)                            | Efficacy                                          | <a href="https://ClinicalTrials.gov/s/how/NCT02963311">https://ClinicalTrials.gov/s/how/NCT02963311</a> |
| NCT01412034<br>(MODE)            | CER-001<br>(Recombinant<br>human Apo-A-<br>1 based HDL<br>mimetic) | Completed                 | Phase 2<br>Interventional<br>Single group<br>Open label      | >12 Years        | HoFH (23)                           | Effect on Plaque Volume<br>assessed by 3Tesla MRI | <a href="https://ClinicalTrials.gov/s/how/NCT01412034">https://ClinicalTrials.gov/s/how/NCT01412034</a> |
| NCT03510715                      | Alirocumab                                                         | Completed                 | Phase 3<br>Interventional<br>Single group<br>Open label      | 8 - 17 Years     | HoFH (18)                           | Efficacy, Safety, Tolerability                    | <a href="https://ClinicalTrials.gov/s/how/NCT03510715">https://ClinicalTrials.gov/s/how/NCT03510715</a> |
| NCT03156621<br>(ODYSSEY<br>HoFH) | Alirocumab                                                         | Completed                 | Phase 3<br>Interventional<br>Randomized<br>Masking Triple    | > 18 Years       | HoFH (69)                           | Efficacy, Safety, Tolerability                    | <a href="https://ClinicalTrials.gov/s/how/NCT03156621">https://ClinicalTrials.gov/s/how/NCT03156621</a> |
| NCT03403374<br>(RAMAN)           | Evolocumab                                                         | Completed                 | Phase 4<br>Interventional Single<br>group<br>Open label      | 12 - 80<br>Years | HoFH (30)                           | Efficacy, Safety, Tolerability                    | <a href="https://ClinicalTrials.gov/s/how/NCT03403374">https://ClinicalTrials.gov/s/how/NCT03403374</a> |
| NCT01624142<br>(TAUSSIG)         | Evolocumab                                                         | Completed                 | Phases 2 & 3<br>Interventional<br>Single group<br>Open label | 12 - 80 Years    | Severe FH (300)                     | Efficacy, Safety, Tolerability                    | <a href="https://ClinicalTrials.gov/s/how/NCT01624142">https://ClinicalTrials.gov/s/how/NCT01624142</a> |

|                             |                                          |                           |                                                                               |                  |                   |                                |                                                                                                       |
|-----------------------------|------------------------------------------|---------------------------|-------------------------------------------------------------------------------|------------------|-------------------|--------------------------------|-------------------------------------------------------------------------------------------------------|
| NCT02624869<br>(HAUSER-OLE) | Evolocumab                               | Completed                 | Phase 3<br>Interventional<br>Single group<br>Open label                       | 10 - 17<br>Years | FH (163)          | Efficacy, Safety, Tolerability | <a href="https://ClinicalTrials.gov/show/NCT02624869">https://ClinicalTrials.gov/show/NCT02624869</a> |
| NCT01588496<br>(TESLA)      | Evolocumab                               | Completed                 | Phases 2 & 3<br>Interventional<br>Randomized<br>Masking Quadruple             | 12 - 80<br>Years | HoFH (58)         | Efficacy,                      | <a href="https://ClinicalTrials.gov/show/NCT01588496">https://ClinicalTrials.gov/show/NCT01588496</a> |
| NCT04031742                 | IBI306 (PCSK9<br>Monoclonal AB)          | Active, not<br>recruiting | Phases 2-3<br>Interventional<br>Single group<br>Open label                    | 18 – 80<br>Years | HoFH (30)         | Efficacy, Safety, Tolerability | <a href="https://ClinicalTrials.gov/show/NCT04031742">https://ClinicalTrials.gov/show/NCT04031742</a> |
| NCT04515927                 | JS002<br>(Monoclonal<br>PCSK9 inh)       | Active, not<br>recruiting | Phase 2<br>Interventional<br>Single group<br>Open label                       | 12 - 75<br>Years | Hyperlipemia (30) | Efficacy, Safety, Tolerability | <a href="https://ClinicalTrials.gov/show/NCT04515927">https://ClinicalTrials.gov/show/NCT04515927</a> |
| NCT04034485                 | Lerodalcibep vs<br>Evolocumab            | Active, not<br>recruiting | Phase 3<br>Interventional<br>Randomized<br>Cross-over<br>Open label           | > 10 Years       | HoFH (70)         | Efficacy, Safety, Tolerability | <a href="https://ClinicalTrials.gov/show/NCT04034485">https://ClinicalTrials.gov/show/NCT04034485</a> |
| NCT04455581                 | Recaticimab<br>(Monoclonal<br>PCSK9 inh) | Unknown<br>status         | Phase 2<br>Interventional<br>Single group<br>Open label                       | 18- 80 Years     | FH (8)            | Efficacy, Safety, Tolerability | <a href="https://ClinicalTrials.gov/show/NCT04455581">https://ClinicalTrials.gov/show/NCT04455581</a> |
| NCT04948008                 | IBI306<br>(Monoclonal<br>PCSK9 inh)      | Recruiting                | Phases 2 & 3<br>Interventional<br>Randomized<br>Single group<br>MaskingTriple | 18 - 80<br>Years | HoFH (8)          | Efficacy, Safety, Tolerability | <a href="https://ClinicalTrials.gov/show/NCT04948008">https://ClinicalTrials.gov/show/NCT04948008</a> |
| NCT03933293                 | Ebronucimab<br>(Monoclonal<br>PCSK9 inh) | Unknown<br>status         | Phase 2<br>Interventional<br>Randomized                                       | > 18 Years       | HoFH (59)         | Efficacy, Safety, Tolerability | <a href="https://ClinicalTrials.gov/show/NCT03933293">https://ClinicalTrials.gov/show/NCT03933293</a> |

|                                 |                       |            |                                                               |               |            |                                          |                                                                                                       |
|---------------------------------|-----------------------|------------|---------------------------------------------------------------|---------------|------------|------------------------------------------|-------------------------------------------------------------------------------------------------------|
|                                 |                       |            | Masking Quadruple                                             |               |            |                                          |                                                                                                       |
| NCT01109368                     | Standart care         | Recruiting | Observational Cohort Prospective                              | Child, Adult  | HoFH (60)  | Change in disease progression            | <a href="https://ClinicalTrials.gov/show/NCT01109368">https://ClinicalTrials.gov/show/NCT01109368</a> |
| NCT04681170                     | Lomitapide            | Recruiting | Phase 3 Interventional Randomized Open label                  | 5 -17 Years   | HoFH (45)  | Efficacy, Safety, Tolerability           | <a href="https://ClinicalTrials.gov/show/NCT04681170">https://ClinicalTrials.gov/show/NCT04681170</a> |
| NCT01556906                     | Lomitapide            | Completed  | Phase 2 Interventional Single group Open label                | > 13 Years    | HoFH (6)   | Safety, Tolerability and Efficacy        | <a href="https://ClinicalTrials.gov/show/NCT01556906">https://ClinicalTrials.gov/show/NCT01556906</a> |
| NCT02173158                     | Lomitapide            | Completed  | Phase 3 Interventional Single group Open label                | > 18 Years    | HoFH (9)   |                                          | <a href="https://ClinicalTrials.gov/show/NCT02173158">https://ClinicalTrials.gov/show/NCT02173158</a> |
| NCT00943306                     | Lomitapide            | Completed  | Phase 3 Interventional Single group Open label                | > 18 Years    | HoFH (19)  | Efficacy, Safety, Tolerability Long term | <a href="https://ClinicalTrials.gov/show/NCT00943306">https://ClinicalTrials.gov/show/NCT00943306</a> |
| NCT00730236                     | Lomitapide            | Completed  | Phase 3 Interventional Single group Open label                | > 18 Years    | HoFH (29)  |                                          | <a href="https://ClinicalTrials.gov/show/NCT00730236">https://ClinicalTrials.gov/show/NCT00730236</a> |
| NCT02135705<br>(LOWER Registry) | Lomitapide            | Recruiting | Observational Model Cohort   Time Perspective Prospective     | Child, Adult, | HoFH (300) |                                          | <a href="https://ClinicalTrials.gov/show/NCT02135705">https://ClinicalTrials.gov/show/NCT02135705</a> |
| NCT00079846                     | Implitapide (MTP inh) | Terminated | Phase 2 Interventional Randomized Single group Masking Double | 8 - 70 Years  | FH (60)    |                                          | <a href="https://ClinicalTrials.gov/show/NCT00079846">https://ClinicalTrials.gov/show/NCT00079846</a> |

|                             |                                                                 |                   |                                                              |            |                 |                                             |                                                                                                                       |
|-----------------------------|-----------------------------------------------------------------|-------------------|--------------------------------------------------------------|------------|-----------------|---------------------------------------------|-----------------------------------------------------------------------------------------------------------------------|
| NCT00607373<br>(RADICHOL 1) | Mipomersen                                                      | Completed         | Phase 3<br>Interventional<br>Randomized<br>Masking Quadruple | > 12 Years | HoFH (51)       | Efficacy, Safety, Tolerability              | <a href="https://ClinicalTrials.gov/s&lt;br/&gt;how/NCT00607373">https://ClinicalTrials.gov/s<br/>how/NCT00607373</a> |
| NCT00477594                 | Mipomersen                                                      | Completed         | Phase 2<br>Interventional<br>Randomized<br>Open label        | > 12 Years | HoFH (21)       | Efficacy, Safety, Tolerability              | <a href="https://ClinicalTrials.gov/s&lt;br/&gt;how/NCT00477594">https://ClinicalTrials.gov/s<br/>how/NCT00477594</a> |
| NCT00694109                 | Mipomersen                                                      | Completed         | Phase 3<br>Interventional<br>Single group<br>Open label      | > 12 Years | HoFH (144)      | Long term Efficacy, Safety,<br>Tolerability | <a href="https://ClinicalTrials.gov/s&lt;br/&gt;how/NCT00694109">https://ClinicalTrials.gov/s<br/>how/NCT00694109</a> |
| NCT00280995                 | Mipomersen                                                      | Completed         | Phase 2<br>Interventional<br>Randomized<br>Open label        | > 18 Years | HoFH (12)       | Dose-escalating Safety                      | <a href="https://ClinicalTrials.gov/s&lt;br/&gt;how/NCT00280995">https://ClinicalTrials.gov/s<br/>how/NCT00280995</a> |
| NCT02651675                 | AAV directed<br>hLDLR gene<br>therapy                           | Completed         | Phases 1& 2<br>Interventional<br>Single group<br>Open label  | > 18 Years | HoFH (9)        | Efficacy, Safety, Tolerability              | <a href="https://ClinicalTrials.gov/s&lt;br/&gt;how/NCT02651675">https://ClinicalTrials.gov/s<br/>how/NCT02651675</a> |
| NCT03135184                 | Device HDL<br>Therapeutics<br>PDS-2 System                      | Unknown<br>status | Interventional<br>Single group<br>Open label                 | > 12 Years | HoFH (6)        | Efficacy, Safety, Tolerability              | <a href="https://ClinicalTrials.gov/s&lt;br/&gt;how/NCT03135184">https://ClinicalTrials.gov/s<br/>how/NCT03135184</a> |
| NCT01841684                 | Anacetrapib<br>(CETP inh)                                       | Terminated        | Phase 3<br>Interventional<br>Randomized<br>Masking Double    | > 18 Years | HeFH & HoFH (2) | Efficacy, Safety, Tolerability              | <a href="https://ClinicalTrials.gov/s&lt;br/&gt;how/NCT01841684">https://ClinicalTrials.gov/s<br/>how/NCT01841684</a> |
| NCT02472535                 | Seladelpar<br>(MBX-8025)<br>specific PPAR-<br>$\delta$ agonist. | Completed         | Phase 2<br>Interventional<br>Single group<br>Open label      | > 18 Years | HoFH (13)       | Efficacy, Safety, Tolerability              | <a href="https://ClinicalTrials.gov/s&lt;br/&gt;how/NCT02472535">https://ClinicalTrials.gov/s<br/>how/NCT02472535</a> |

|                           |                                                               |                        |                                                     |               |                                                                 |                                                      |                                                                                                       |
|---------------------------|---------------------------------------------------------------|------------------------|-----------------------------------------------------|---------------|-----------------------------------------------------------------|------------------------------------------------------|-------------------------------------------------------------------------------------------------------|
| NCT04080050               | RGX-501 Single (IV) (LDLR) Gene Therapy                       | Active, not recruiting | Observational                                       | > 18 Years    | HoFH (8)                                                        | Efficacy, Safety, Tolerability                       | <a href="https://ClinicalTrials.gov/show/NCT04080050">https://ClinicalTrials.gov/show/NCT04080050</a> |
| NCT03018678               | Screening Protocol for a Gene Therapy Trial                   | Completed              | Observational Prospective                           | > 18 Years    | HoFH (21)                                                       |                                                      | <a href="https://ClinicalTrials.gov/show/NCT03018678">https://ClinicalTrials.gov/show/NCT03018678</a> |
| NCT02722408 (COBALT-1)    | Gemcabene                                                     | Completed              | Phase 2 Interventional Single group Open label      | > 17 Years    | HoFH (8)                                                        | Efficacy, Safety, Tolerability                       | <a href="https://ClinicalTrials.gov/show/NCT02722408">https://ClinicalTrials.gov/show/NCT02722408</a> |
| NCT00515307               | Bone Marrow Stem Cells (Allogenic Hepatocyte Transplantation) | Completed              | Phase 1 Interventional Single group Open label      | Child, Adult, | HoFH (1)                                                        | Efficacy, Safety, Tolerability                       | <a href="https://ClinicalTrials.gov/show/NCT00515307">https://ClinicalTrials.gov/show/NCT00515307</a> |
| NCT00263081               | Lapaquistat (squalene synthase inhibitor)                     | Terminated             | Phase 3 Interventional Randomized Masking Quadruple | > 8 Years     | HoFH (44)                                                       | Efficacy, Safety, Tolerability                       | <a href="https://ClinicalTrials.gov/show/NCT00263081">https://ClinicalTrials.gov/show/NCT00263081</a> |
| NCT00705211               | Ezetimibe                                                     | Completed              | Observational Prospective                           | Child, Adult, | Hypercholesterolemia, FH, Homozygous Sitosterolemia (All:1794)  | Efficacy, Safety, Tolerability in Japanese Subjects  | <a href="https://ClinicalTrials.gov/show/NCT00705211">https://ClinicalTrials.gov/show/NCT00705211</a> |
| NCT00704444               | Ezetimibe                                                     | Completed              | Observational Prospective                           | Child, Adult, | Hypercholesterolemia, FH, Homozygous Sitosterolemia (All 11332) | 12-week postmarketing Efficacy, Safety, Tolerability | <a href="https://ClinicalTrials.gov/show/NCT00704444">https://ClinicalTrials.gov/show/NCT00704444</a> |
| NCT03884452 (MK-0653-018) | Ezetimibe                                                     | Completed              | Phase 3 Interventional Randomized                   | > 12 Years    | FH (50)                                                         | Efficacy, Safety, Tolerability                       | <a href="https://ClinicalTrials.gov/show/NCT03884452">https://ClinicalTrials.gov/show/NCT03884452</a> |

|                                         |                                                                  |           |                                                              |              |                                                    |                                                                          |                                                                                                       |
|-----------------------------------------|------------------------------------------------------------------|-----------|--------------------------------------------------------------|--------------|----------------------------------------------------|--------------------------------------------------------------------------|-------------------------------------------------------------------------------------------------------|
|                                         |                                                                  |           | Masking Double                                               |              |                                                    |                                                                          |                                                                                                       |
| NCT00704535                             | Ezetimibe                                                        | Completed | Observational<br>Prospective                                 | > 18 Years   | Primary<br>Hypercholesterolemia HoFH (4105)        | Efficacy, Safety, Tolerability<br>in a Select Population of<br>Filipinos | <a href="https://ClinicalTrials.gov/show/NCT00704535">https://ClinicalTrials.gov/show/NCT00704535</a> |
| NCT01070966                             | Vytorin<br>(Ezetimibe)<br>Reexamination<br>Study (0653A-<br>174) | Completed | Observational<br>Prospective                                 | > 10 Years   | Primary<br>Hypercholesterolemia and HoFH<br>(2089) | Efficacy, Safety, Tolerability                                           | <a href="https://ClinicalTrials.gov/show/NCT01070966">https://ClinicalTrials.gov/show/NCT01070966</a> |
| NCT03885921<br>(P01417/MK-<br>0653-019) | Ezetimibe                                                        | Completed | Phase 3<br>Interventional<br>Randomized<br>Masking Quadruple | > 12 Years   | HoFH (44)                                          | Efficacy, Safety, Tolerability                                           | <a href="https://ClinicalTrials.gov/show/NCT03885921">https://ClinicalTrials.gov/show/NCT03885921</a> |
| NCT02434497                             | Rosuvastatin<br>20mg                                             | Completed | Phase 3<br>Interventional<br>Single group<br>Open label      | 6 - 18 Years | HoFH (9)                                           | Efficacy, Safety, Tolerability                                           | <a href="https://ClinicalTrials.gov/show/NCT02434497">https://ClinicalTrials.gov/show/NCT02434497</a> |
| NCT02226198<br>(HYDRA)                  | Rosuvastatin<br>20mg                                             | Completed | Phase 3<br>Interventional<br>Randomized<br>Masking Triple    | 6 - 17 Years | HoFH (20)                                          | Efficacy, Safety, Tolerability                                           | <a href="https://ClinicalTrials.gov/show/NCT02226198">https://ClinicalTrials.gov/show/NCT02226198</a> |

*Abbreviations FH; Familial Hypercholesterolemia, HoFH, Homozygous Familial Hypercholesterolemia; HeFH; Heterozygous Familial Hypercholesterolemia, LDLR; Low density lipoprotein receptor,*
